# Supplementary material for: Duration of Cellular and Humoral Responses after Quadrivalent Human Papillomavirus Vaccination in Healthy Female Adults with or without Prior Type 16 and/or 18 Exposure
Source: PubMed Central journal article supplement (PMC7563427; doi:10.3390/vaccines8030348), 2020-06-30
Supplement: vaccines-08-00348-s001.pdf [file vaccines-08-00348-s001.pdf]

Table S1. Number of IL-2, IL-4, IL-21, and/or INF- $\gamma$  Positive Cells per Million CD4 T Cells by Previous Exposure to HPV.

| Measurement at Study Timepoint         | HPV-16                          |                                |              | HPV-18                          |                                |              |
|----------------------------------------|---------------------------------|--------------------------------|--------------|---------------------------------|--------------------------------|--------------|
|                                        | ELISA-Negative and DNA-Negative | ELISA-Positive or DNA-Positive | All Subjects | ELISA-Negative and DNA-Negative | ELISA-Positive or DNA-Positive | All Subjects |
| <b>Day 0</b>                           |                                 |                                |              |                                 |                                |              |
| N                                      | 33                              | 11                             | 44           | 34                              | 10                             | 44           |
| Min, Max                               | 0, 291                          | 0, 1888                        | 0, 1888      | 0, 416                          | 0, 2329                        | 0, 2329      |
| Geometric Mean (GSD)                   | 59 (1)                          | 94 (3)                         | 66 (2)       | 33 (2)                          | 76 (6)                         | 40 (3)       |
| <b>Day 67</b>                          |                                 |                                |              |                                 |                                |              |
| N                                      | 33                              | 11                             | 44           | 34                              | 10                             | 44           |
| Min, Max                               | 108, 2746                       | 113, 3866                      | 108, 3866    | 53, 3211                        | 296, 3371                      | 53, 3371     |
| Geometric Mean (GSD)                   | 672 (2)                         | 873 (3)                        | 718 (2)      | 588 (2)                         | 1137(2)                        | 683 (2)      |
| 95% CI of Geometric Mean [1]           | 498, 908                        | 416,1832                       | 544, 947     | 436, 793                        | 608, 2126                      | 521, 897     |
| P-Value[2]                             | 0.0197                          | 0.0314                         | 0.0003       | < 0.0001                        | 0.0002                         | < 0.0001     |
| Responders (%) <sup>3</sup>            | 30 (91%)                        | 9 (82%)                        | 39 (89%)     | 26 (77%)                        | 9 (90%)                        | 35 (80%)     |
| 95% CI for Responders (%) <sup>4</sup> | 76%, 98%                        | 48%, 97%                       | 75%, 96%     | 59%, 89%                        | 56%, 100%                      | 65%, 90%     |
| <b>Day 187</b>                         |                                 |                                |              |                                 |                                |              |
| N                                      | 29                              | 8                              | 37[5]        | 30                              | 8                              | 38           |
| Min, Max                               | 233, 3718                       | 140, 4557                      | 140, 4557    | 173, 2690                       | 234, 2126                      | 173, 2690    |
| Geometric Mean (GSD)                   | 972 (2)                         | 1021 (3)                       | 983 (2)      | 841(2)                          | 972(3)                         | 867 (2)      |
| 95% CI of Geometric Mean[1]            | 751, 1259                       | 366, 2845                      | 751, 1286    | 662, 1069                       | 455, 2077                      | 690, 1089    |
| P-Value[2]                             | 0.0002                          | 0.0459                         | < 0.0001     | < 0.0001                        | 0.0008                         | < 0.0001     |
| Responders (%) <sup>3</sup>            | 28 (97%)                        | 6 (75%)                        | 34 (92%)     | 27 (90%)                        | 6 (75%)                        | 33 (87%)     |
| 95% CI for Responders (%) <sup>4</sup> | 82%, 100%                       | 35%, 97%                       | 78%, 98%     | 73%, 98%                        | 35%, 97%                       | 72%, 96%     |

Note: N = Number of subjects in the prospective cohort. GSD=Geometric Standard Deviation; CI=Confidence Interval.

[1]CI is estimated using a two-sided Normal Approximation Method.

[2]Based on a regression analysis with baseline in the model using a 0.05% significance level testing that the slope equals one.

[3]A responder was defined as subjects whose value is greater than baseline value and with >180 HPV-16+ or >296 HPV-18+ CD4 T cells per million of total CD4 T cells.

[4]CI is estimated using a two-sided Exact (Clopper-Pearson) Method .

[5]HPV-16 test in one of the samples was not qualified for data analysis.

**Table S2.** Baseline and Post-Vaccination ELISA Results in Prospective Cohort Stratified by HPV Exposure Status.

|                           | Antibody Levels by ELISA (IU/mL) |                                |              |                                 |                                |              |
|---------------------------|----------------------------------|--------------------------------|--------------|---------------------------------|--------------------------------|--------------|
|                           | HPV-16                           |                                |              | HPV-18                          |                                |              |
|                           | ELISA-Negative and DNA-Negative  | ELISA-Positive or DNA-Positive | All Subjects | ELISA-Negative and DNA-Negative | ELISA-Positive or DNA-Positive | All Subjects |
| <b>Day 0 (pre dose 1)</b> |                                  |                                |              |                                 |                                |              |
| N                         | 36                               | 11                             | 47           | 37                              | 10                             | 47           |
| Min, Max                  | 0.0, 1.3                         | 0.1, 354.0                     | 0.0, 354.0   | 0.0, 0.9                        | 1.6, 12.8                      | 0.0, 12.8    |
| Geometric Mean (GSD)      | 0.2 (2.8)                        | 9.80 (9.0)                     | 0.4 (9.2)    | 0.2 (2.8)                       | 3.9 (2.2)                      | 0.3 (5.2)    |

|                                    |               |               |                |               |               |               |
|------------------------------------|---------------|---------------|----------------|---------------|---------------|---------------|
| <b>Day 67 (day 7 post dose 2)</b>  |               |               |                |               |               |               |
| N                                  | 34            | 11            | 45             | 35            | 10            | 45            |
| Min, Max                           | 7.4, 2650.0   | 10.4, 4320.0  | 7.4, 4320.0    | 1.7, 788.2    | 21.5, 823.5   | 1.7, 823.5    |
| Geometric Mean (GSD)               | 165.0 (3.6)   | 499.0 (6.7)   | 216.3(4.5)     | 39.2 (4.1)    | 165.5(3.4)    | 54.0 (4.4)    |
| 95% CI of Geometric Mean [1]       | 105.9, 257.0  | 138.2, 1801.5 | 137.5, 340.1   | 24.2, 63.7    | 68.3, 400.7   | 34.6, 84.5    |
| P-Value [2]                        | 0.0004        | 0.0926        | < 0.0001       | 0.0007        | 0.4052        | < 0.0001      |
| Responders (%) [3]                 | 34 (100.0%)   | 11 (100.0%)   | 45 (100.0%)    | 35 (100.0%)   | 10 (100.0%)   | 45 (100.0%)   |
| 95% CI for Responders (%) [4]      | 89.7%, 100.0% | 71.5%, 100.0% | 92.1%, 100.0%  | 90.0%, 100.0% | 69.2%, 100.0% | 92.1%, 100.0% |
| <b>Day 187 (day 7 post dose 3)</b> |               |               |                |               |               |               |
| N                                  | 32            | 9             | 41             | 32            | 9             | 41            |
| Min, Max                           | 20.1, 780.0   | 75.8, 2840.0  | 20.1, 2840.0   | 2.5, 947.1    | 23.7, 444.7   | 2.5, 947.1    |
| Geometric Mean (GSD)               | 207.8 (2.3)   | 442.0 (3.4)   | 245.3 (2.6)    | 74.3 (3.8)    | 120.8 (2.4)   | 82.7 (3.5)    |
| 95% CI of Geometric Mean [1]       | 154.8, 279.0  | 172.1, 1135.5 | 181.2,331.8    | 46.0, 119.9   | 61.9, 235.8   | 55.8, 122.6   |
| P-Value [2]                        | < 0.0001      | 0.0091        | < 0.0001       | 0.0014        | 0.1439        | < 0.0001      |
| Responders (%) [3]                 | 32 (100.0%)   | 9 (100.0%)    | 41 (100.0%)    | 32 (100.0%)   | 9 (100.0%)    | 41 (100.0%)   |
| 95% CI for Responders (%) [4]      | 89.1%, 100.0% | 66.4%, 100.0% | 91.4%, 100.0%  | 89.1%, 100.0% | 66.4%, 100.0% | 91.4%, 100.0% |
| <b>Day 365</b>                     |               |               |                |               |               |               |
| N                                  | 31            | 9             | 40             | 32            | 8             | 40            |
| Min, Max                           | 20.5, 604.0   | 24.0, 1400.0  | 20.5, 1400.0   | 2.4, 399.4    | 13.8, 374.1   | 2.4, 399.4    |
| Geometric Mean (GSD)               | 110.8 (2.2)   | 243.3 (3.7)   | 132.3 (2.6)    | 27.5 (3.5)    | 78.8 (2.8)    | 34.0 (3.6)    |
| 95% CI of Geometric Mean [1]       | 83.5, 147.1   | 88.8, 666.7   | 97.3, 179.     | 17.5, 43.2    | 33.8, 183.6   | 22.7, 51.0    |
| P-Value [2]                        | < 0.0001      | 0.0148        | < 0.0001       | 0.0001        | 0.1631        | < 0.0001      |
| Responders (%) [3]                 | 31 (100.0%)   | 9 (100.0%)    | 40 (100.0%)    | 32 (100.0%)   | 8 (100.0%)    | 40 (100.0%)   |
| 95% CI for Responders (%) [4]      | 88.8%, 100.0% | 66.4%, 100.0% | 91.19%, 100.0% | 89.1%, 100.0% | 63.1%, 100.0% | 91.2%, 100.0% |
| <b>Day 545</b>                     |               |               |                |               |               |               |
| N                                  | 29            | 9             | 38             | 30            | 8             | 38            |
| Min, Max                           | 11.2, 409.0   | 14.4, 779.0   | 11.2, 779.0    | 0.0, 201.8    | 11.4, 327.7   | 0.0, 327.7    |
| Geometric Mean (GSD)               | 65.0 (2.3)    | 172.5 (3.9)   | 81.6 (2.8)     | 13.7 (5.0)    | 50.9 (2.7)    | 18.1 (4.9)    |
| 95% CI of Geometric Mean [1]       | 47.7, 88.5    | 60.5, 492.2   | 58.2, 115.2    | 7.5 , 25.0    | 22.3, 116.3   | 10.8, 30.4    |
| P-Value [2]                        | < 0.0001      | 0.0183        | < 0.0001       | 0.0078        | 0.2333        | < 0.0001      |
| Responders (%) [3]                 | 29 (100.0%)   | 9 (100.0%)    | 38 (100.0%)    | 29 (96.7%)    | 8 (100.0%)    | 37 (97.4%)    |
| 95% CI for Responders (%) [4]      | 88.1%, 100.0% | 66.4%, 100.0% | 90.8%, 100.0%  | 82.8%, 99.9%  | 63.0%, 100.0% | 86.2%, 99.9%  |
| <b>Day 730</b>                     |               |               |                |               |               |               |
| N                                  | 26            | 9             | 35             | 28            | 7             | 35            |
| Min, Max                           | 17.3, 370.0   | 12.1, 606.0   | 12.1, 606.0    | 0.8, 155.9    | 8.1, 68.8     | 0.8, 155.9    |
| Geometric Mean (GSD)               | 50.7 (2.3)    | 142.7 (4.2)   | 66.2 (3.0)     | 10.9 (3.5)    | 32.2 (2.2)    | 13.5 (3.5)    |
| 95% CI of Geometric Mean [1]       | 36.4, 70.6    | 47.5, 428.7   | 45.5, 96.2     | 6.7, 17.7     | 15.6, 66.4    | 8.8, 20.7     |

|                               |               |               |                |              |                |              |
|-------------------------------|---------------|---------------|----------------|--------------|----------------|--------------|
| P-Value [2]                   | < 0.0001      | 0.0356        | < 0.0001       | 0.0010       | 0.0009         | < 0.0001     |
| Responders (%) [3]            | 26 (100.0%)   | 9 (100.0%)    | 35 (100.0%)    | 27 (96.4%)   | 7 (100.0%)     | 34 (97.1%)   |
| 95% CI for Responders (%) [4] | 86.8%, 100.0% | 66.4%, 100.0% | 90.0 %, 100.0% | 81.7%, 99.9% | 59.0 %, 100.0% | 85.1%, 99.9% |

Note: N = Number of subjects in the prospective cohort. GSD=Geometric Standard Deviation; CI=Confidence Interval.[1] CI is estimated using a two-sided Normal Approximation Method [2] Based on a regression analysis with baseline in the model using a 0.05% significance level testing that the slope equals one. [3] A responder was defined as seropositive by the laboratory. The denominator for percentages is based on the total number of subjects (n) with a result at the visit being summarized. [4] CI is estimated using a two-sided Exact (Clopper-Pearson) Method.

**Table S3.** Percentage of CFSE<sup>low</sup> CD4 T cells (%) by Previous Exposure to HPV.

|                               | HPV-16                          |                                |               | HPV-18                          |                                |               |
|-------------------------------|---------------------------------|--------------------------------|---------------|---------------------------------|--------------------------------|---------------|
|                               | ELISA-Negative and DNA-Negative | ELISA-Positive or DNA-Positive | All Subjects  | ELISA-Negative and DNA-Negative | ELISA-Positive or DNA-Positive | All Subjects  |
| <b>Day 0</b>                  |                                 |                                |               |                                 |                                |               |
| N                             | 35                              | 10                             | 45            | 36                              | 9                              | 45            |
| Min, Max                      | 0.00, 1.11                      | 0.00, 0.54                     | 0.00, 1.11    | 0.00, 1.24                      | 0.00, 1.18                     | 0.00, 1.24    |
| Geometric Mean (GSD)          | 0.00 (4.09)                     | 0.00 (3.73)                    | 0.00 (3.97)   | 0.00 (8.69)                     | 0.00 (18.23)                   | 0.00 (10.86)  |
| <b>Day 365</b>                |                                 |                                |               |                                 |                                |               |
| N                             | 31                              | 9                              | 40            | 32                              | 8                              | 40            |
| Min, Max                      | 0.00, 14.73                     | 0.00, 5.57                     | 0.00, 14.73   | 0.00, 12.33                     | 0.00, 4.43                     | 0.00, 12.33   |
| Geometric Mean (GSD)          | 0.85 (5.22)                     | 0.32 (5.59)                    | 0.68 (5.46)   | 0.59 (5.43)                     | 0.44 (12.59)                   | 0.56 (6.39)   |
| 95% CI of Geometric Mean[1]   | 0.47, 1.57                      | 0.08, 1.19                     | 0.38, 1.18    | 0.32, 1.09                      | 0.05, 3.64                     | 0.31, 1.01    |
| P-Value [2]                   | 0.0250                          | 0.0216                         | 0.0011        | 0.0002                          | 0.0079                         | < 0.0001      |
| Responders (%) [3]            | 25 (80.6%)                      | 6 (66.7%)                      | 31 (77.5%)    | 30 (93.8%)                      | 5 (62.5%)                      | 35 (87.5%)    |
| 95% CI for Responders (%) [4] | 62.5%, 92.6%                    | 29.9 %, 92.5 %                 | 61.6%, 89.2%  | 79.2%, 99.2 %                   | 24.5%, 91.5%                   | 73.2%, 95.8%  |
| <b>Day 545</b>                |                                 |                                |               |                                 |                                |               |
| N                             | 28                              | 9                              | 37            | 29                              | 8                              | 37            |
| Min, Max                      | 0.00, 16.15                     | 0.04, 7.61                     | 0.00, 16.15   | 0.02, 16.65                     | 0.00, 7.77                     | 0.00, 16.65   |
| Geometric Mean (GSD)          | 1.126 (6.14)                    | 0.57 (5.42)                    | 0.95 (5.97)   | 0.75 (6.30)                     | 0.51 (15.23)                   | 0.69 (7.58)   |
| 95% CI of Geometric Mean[1]   | 0.56, 2.28                      | 0.156, 2.09                    | 0.53, 1.73    | 0.37 1.50                       | 0.052, 4.95                    | 0.35, 1.35    |
| P-Value [2]                   | 0.1435                          | 0.4711                         | 0.0920        | 0.0018                          | 0.3280                         | 0.0002        |
| Responders (%) [3]            | 25 (89.3%)                      | 7 (77.8%)                      | 32 (86.5%)    | 28 (96.6%)                      | 4 (50.0%)                      | 32 (86.5%)    |
| 95% CI for Responders (%) [4] | 71.8%, 97.7%                    | 40.0%, 97.2%                   | 71.2 %, 95.5% | 82.2%, 99.9%                    | 15.7%, 84.3%                   | 71.2 %, 95.5% |
| <b>Day 730</b>                |                                 |                                |               |                                 |                                |               |
| N                             | 26                              | 9                              | 35            | 28                              | 7                              | 35            |
| Min, Max                      | 0.08, 9.48                      | 0.10, 8.73                     | 0.08, 9.48    | 0.06, 4.77                      | 0.16, 10.48                    | 0.06, 10.48   |
| Geometric Mean (GSD)          | 1.39 (3.22)                     | 0.65 (4.76)                    | 1.14 (3.67)   | 0.77 (3.28)                     | 1.97 (3.77)                    | 0.93 (3.51)   |
| 95% CI of Geometric Mean[1]   | 0.87 2.23                       | 0.20, 2.15                     | 0.73, 1.79    | 0.48, 1.21                      | 0.58, 6.73                     | 0.60, 1.43    |
| P-Value [2]                   | 0.0010                          | 0.1949                         | 0.0006        | < 0.0001                        | 0.0241                         | < 0.0001      |
| Responders (%) [3]            | 24 (92.3%)                      | 7 (77.8%)                      | 31 (88.6%)    | 26 (92.9%)                      | 4 (57.1%)                      | 30 (85.7%)    |
| 95% CI for Responders (%) [4] | 74.9%, 99.1%                    | 40.0%, 97.2%                   | 73.3%, 96.8 % | 76.5 %, 99.1%                   | 18.4%, 90.1%                   | 69.7%, 95.2%  |

Note: N = Number of subjects in the prospective cohort. GSD=Geometric Standard Deviation; CI=Confidence Interval. [1] CI is estimated using a two-sided Normal Approximation Method. [2] Based on a regression analysis with baseline in the model using a 0.05% significance level testing that the slope equals one. [3] A responder was defined as having a result two times above the baseline value. The denominator for percentages is based on the total number of subjects (n) with a result at the visit being summarized. [4] CI is estimated using a two-sided Exact (Clopper-Pearson) Method.

**Table S4:** Comparison of Elapsed Time in Days from Last Vaccination at Enrollment in Retrospective Cohorts.

| Statistics     | Retrospective With 2 Prior HPV Vaccinations (N=74) | Retrospective With 3 Prior HPV Vaccinations (N=77) | Difference 3 Prior versus 2 Prior |
|----------------|----------------------------------------------------|----------------------------------------------------|-----------------------------------|
| Mean (SD)      | 748 (619)                                          | 1581 (222)                                         | 833 (461)                         |
| Median         | 471 (16 months)                                    | 1608(54 months)                                    |                                   |
| Min, Max       | 181, 2419                                          | 1100, 1986                                         |                                   |
| 95% CI of Mean |                                                    |                                                    | 684,980 [1]                       |
| P-Value        |                                                    |                                                    | <0.0001 [2]                       |

Note: N=subjects with samples can be tested. [1] 95% CI was calculated using a two-sided test using Normal Approximation Method. [2] P-value is based on a two-sample t-test using a 2-sided 0.05% significance level.

**Table S5:** Antibody Levels in Retrospective Cohorts.

|                                 | ELISA (IU/mL)  |                |                              | Pseudovirion Neutralizing Assay (1/dilution) |                |                              |
|---------------------------------|----------------|----------------|------------------------------|----------------------------------------------|----------------|------------------------------|
|                                 | Retro 2 (N=74) | Retro 3 (N=77) | Difference 3 Prior - 2 Prior | Retro 2 (N=74)                               | Retro 3 (N=77) | Difference 3 Prior - 2 Prior |
| <b>HPV-16</b>                   |                |                |                              |                                              |                |                              |
| Min, Max                        | 3.4, 794.0     | 0.1, 1280.0    | N/A                          | 100.0, 51200.0                               | 0.0, 25600.0   | N/A                          |
| Geometric Mean (GSD)            | 52.5 (3.7)     | 65.9 (3.8)     | 1.3 (3.7) [6]                | 1289.9 (4.2)                                 | 1814.8 (3.8)   | 1.4 (4.0) [6]                |
| 95% CI of Geometric Mean [1]    | 38.9, 70.9     | 48.7, 89.1     | 0.8, 1.9[6]                  | 922.6, 1803.3                                | 1340., 2456.5  | 0.9, 2.2[6]                  |
| <b>P-Value [2]</b>              |                |                | <b>0.2885</b>                |                                              |                | <b>0.1335</b>                |
| Seropositive (%) [3]            | 74 (100.0%)    | 76 (98.7%)     | -1.3% [7]                    | 74 (100.0%)                                  | 75 (97.4%)     | -2.6% [7]                    |
| 95% CI for Seropositive (%) [4] | 95.1 %, 100.0% | 93.0%, 100.0%  | -3.8 %, 1.2 % [7]            | 95.1 %, 100.0 %                              | 90.9 %, 99.7%  | -6.2%, 1.0% [7]              |
| <b>P-Value [5]</b>              |                |                | <b>0.3253</b>                |                                              |                | <b>0.1628</b>                |
| <b>HPV-18</b>                   |                |                |                              |                                              |                |                              |
| Min, Max                        | 0.8, 190.6     | 0.3, 183.5     | N/A                          | 0.0, 6400.0                                  | 0.0, 12800.0   | N/A                          |
| Geometric Mean (GSD)            | 9.7 (3.0)      | 15.5 (3.4)     | 1.6 (3.2) [6]                | 228.0 (3.3)                                  | 487.6 (4.4)    | 2.1 (3.9) [6]                |
| 95% CI of Geometric Mean [1]    | 7.5, 12.5      | 11.7, 20.4     | 1., 2.3[6]                   | 172.6, 301.2                                 | 347.9, 683.3   | 1.4, 3.3[6]                  |
| <b>P-Value [2]</b>              |                |                | <b>0.0142</b>                |                                              |                | <b>0.0007</b>                |
| Seropositive (%) [3]            | 69 (93.2%)     | 73 (94.8%)     | 1.6% [7]                     | 68 (91.9%)                                   | 73 (94.8%)     | 2.9% [7]                     |
| 95% CI for Seropositive (%) [4] | 84.9%, 97.8%   | 87.2%, 98.6%   | -6.0%, 9.1% [7]              | 83.2%, 97.0%                                 | 87.2%, 98.6%   | -5.0%, 10.9% [7]             |
| <b>P-Value [5]</b>              |                |                | <b>0.6853</b>                |                                              |                | <b>0.4717</b>                |

Note: N=Numbers of subjects with samples can be tested. GSD=Geometric Standard Deviation; CI=Confidence Interval. [1] Confidence Interval (CI) is estimated using a two-sided Normal Approximation Method. [2] P-value is based on a two-sample t-test using a 2-sided 0.05% significance level. [3] A responder was defined as seropositive by the laboratory. The denominator for percentages is based on the total number of subjects (n) with a result at the visit being summarized. [4] CI is estimated using a two-sided Exact (Clopper-Pearson) Method. [5] P-value is based on a two-sample Chi-square test using a 2-sided 0.05% significance level. [6] Difference is the relative difference. A value of one means the response after two doses is the same as the response after three doses. [7] Difference is the absolute difference.

**Table S6:** Number of HPV + Memory B cells Per Million of Total-IgG secreting B cells by Previous Exposure to HPV.

| Memory B Cells<br>(Number of HPV specific memory B cells/per million of total IgG secreting cells) |        |
|----------------------------------------------------------------------------------------------------|--------|
| HPV-16                                                                                             | HPV-18 |
|                                                                                                    |        |

|                                  | ELISA-<br>Negative and<br>DNA-Negative | ELISA-<br>Positive or<br>DNA-Positive | All<br>Subjects   | ELISA-<br>Negative and<br>DNA-Negative | ELISA-<br>Positive or<br>DNA-Positive | All<br>Subjects   |
|----------------------------------|----------------------------------------|---------------------------------------|-------------------|----------------------------------------|---------------------------------------|-------------------|
| <b>Day 0</b>                     |                                        |                                       |                   |                                        |                                       |                   |
| N                                | 35                                     | 11                                    | 46                | 36                                     | 10                                    | 46                |
| Min, Max                         | 0, 538                                 | 0, 1276                               | 0, 1276           | 0, 658                                 | 0, 906                                | 0, 906            |
| Geometric<br>Mean (GSD)          | 21 (4)                                 | 56 (9)                                | 27 (6)            | 24 (4)                                 | 65 (6)                                | 30 (4)            |
| <b>Day 365</b>                   |                                        |                                       |                   |                                        |                                       |                   |
| N                                | 31                                     | 9                                     | 40                | 32                                     | 8                                     | 40                |
| Min, Max                         | 0, 2574                                | 382, 3430                             | 0, 3430           | 0, 3931                                | 0, 1974                               | 0, 3931           |
| Geometric Mean<br>(GSD)          | 447 (8)                                | 1068 (2)                              | 544(6)            | 209 (6)                                | 274 (6)                               | 221(6)            |
| 95% CI of<br>Geometric Mean[1]   | 217, 921                               | 631,1806                              | 306, 965          | 108, 405                               | 63, 1199                              | 124, 393          |
| P-Value [2]                      | 0.0010                                 | < 0.0001                              | < 0.0001          | 0.0006                                 | 0.0780                                | < 0.0001          |
| Responders (%) [3]               | 20 (64.5%)                             | 7 (77.8%)                             | 27 (67.5%)        | 13 (40.6%)                             | 3 (37.5%)                             | 16 (40.0%)        |
| 95% CI for<br>Responders (%) [4] | 45.37%, 80.77%                         | 39.99%,<br>97.19%                     | 50.87%,<br>81.43% | 23.70%, 59.36%                         | 8.52%, 75.51%                         | 24.86%,<br>56.67% |
| <b>Day 545</b>                   |                                        |                                       |                   |                                        |                                       |                   |
| N                                | 29                                     | 9                                     | 38                | 30                                     | 8                                     | 38                |
| Min, Max                         | 0, 2684                                | 145, 3228                             | 0, 3228           | 0, 1629                                | 96, 1630                              | 0, 1630           |
| Geometric Mean<br>(GSD)          | 610 (3)                                | 562 (3)                               | 599 (3)           | 238 (4)                                | 339 (3)                               | 256(4)            |
| 95% CI of<br>Geometric Mean[1]   | 397, 938                               | 242, 1305                             | 416, 862          | 142, 399                               | 131, 878                              | 165, 397          |
| P-Value [2]                      | < 0.0001                               | 0.0021                                | < 0.0001          | < 0.0001                               | 0.0132                                | < 0.0001          |
| Responders (%) [3]               | 19 (65.5%)                             | 4 (44.4%)                             | 23 (60.5%)        | 9 (30.0%)                              | 3 (37.5%)                             | 12 (31.6%)        |
| 95% CI for<br>Responders (%) [4] | 45.7%, 82.1%                           | 13.7%, 78.8 %                         | 43.4%,<br>76.0%   | 14.7%, 49.4%                           | 8.5%, 75.5%                           | 17.5%,<br>48.7%   |
| <b>Day 730</b>                   |                                        |                                       |                   |                                        |                                       |                   |
| N                                | 26                                     | 9                                     | 35                | 28                                     | 7                                     | 35                |
| Min, Max                         | 0, 1374                                | 48, 2564                              | 0, 2564           | 0, 1022                                | 24, 1185                              | 0, 1185           |
| Geometric Mean<br>(GSD)          | 299.7 (5.18)                           | 491.9 (3.24)                          | 340.5<br>(4.65)   | 168.2 (4.54)                           | 267.3 (4.06)                          | 184.5<br>(4.41)   |
| 95% CI of<br>Geometric Mean[1]   | 154.3, 582.4                           | 199.3, 1213.8                         | 200.8,<br>577.2   | 93.5, 302.5                            | 73.2, 976.4                           | 110.9,<br>307.2   |
| P-Value [2]                      | 0.0004                                 | 0.0034                                | < 0.0001          | 0.0003                                 | 0.0404                                | < 0.0001          |
| Responders (%) [3]               | 13 (50.0%)                             | 3 (33.3%)                             | 16 (45.7%)        | 7 (25.0%)                              | 2 (28.6%)                             | 9 (25.7%)         |
| 95% CI for<br>Responders (%) [4] | 29.9 %, 70.1%                          | 7.5%, 70.1%                           | 28.8%,<br>63.4%   | 10.7%, 44.9%                           | 3.7%, 71.0%                           | 12.5%,<br>43.3%   |

Note: N = Number of subjects in the prospective cohort. ; GSD=Geometric Standard Deviation; CI=Confidence Interval.

[1] CI is estimated using a two-sided Normal Approximation Method.

[2] Based on a regression analysis with baseline in the model using a 0.05% significance level testing that the slope equals one.

[3] A responder was defined as a subject whose value was greater than the baseline value and greater than the following threshold values: HPV-16: 455; HPV-18: 450.

The denominator for percentages is based on the total number of subjects (n) with a result at the visit being summarized.

[4] CI is estimated using a two-sided Exact (Clopper-Pearson) Method.

**Table S7:** Number of HPV + Memory B Cells per Million of Total IgG Secreting B cells in Retrospective Cohorts.

|                                 | Memory B Cells<br>(Number of HPV specific memory B cells/per million total IgG secreting cells) |                                                                 |                                 |
|---------------------------------|-------------------------------------------------------------------------------------------------|-----------------------------------------------------------------|---------------------------------|
|                                 | Retrospective Cohort with 2<br>prior HPV Vaccinations<br>(N=74)                                 | Retrospective Cohort with<br>3 prior HPV Vaccinations<br>(N=72) | Difference<br>3 Prior - 2 Prior |
| <b>HPV-16</b>                   |                                                                                                 |                                                                 |                                 |
| n                               | 74                                                                                              | 72                                                              | N/A                             |
| Min, Max                        | 0, 2444                                                                                         | 0, 2701                                                         | N/A                             |
| Geometric Mean (GSD)            | 301 (4)                                                                                         | 241 (4)                                                         | 0.8 (4) [6]                     |
| 95% CI of Geometric<br>Mean [1] | 218, 428                                                                                        | 169, 343                                                        | 0.49, 1.28 [6]                  |

|                                 |               |               |                  |
|---------------------------------|---------------|---------------|------------------|
| <b>P-Value [2]</b>              |               |               | <b>0.3369</b>    |
| Seropositive (%) [3]            | 38 (51.4%)    | 24 (33.3%)    | -18.0% [7]       |
| 95% CI for Seropositive (%) [4] | 39.4%, 63.15% | 22.7%, 45.43% | -33.8%, -2.3%[7] |
| <b>P-Value [5]</b>              |               |               | <b>0.0277</b>    |
| <b>HPV-18</b>                   |               |               |                  |
| N                               | 74            | 72            | N/A              |
| Min, Max                        | 0, 1726       | 0, 610        | N/A              |
| Geometric Mean (GSD)            | 90 (5)        | 74 (4)        | 0.8 (5) [6]      |
| 95% CI of Geometric Mean [1]    | 62, 129       | 53, 104       | 0.5, 1.4[6]      |
| <b>P-Value [2]</b>              |               |               | <b>0.4545</b>    |
| Seropositive (%) [3]            | 10 (13.5%)    | 1 (1.4%)      | -12.1% [7]       |
| 95% CI for Seropositive (%) [4] | 6.7%, 23.5%   | 0.0%, 7.5 %   | -20.4%, -3.9%[7] |
| <b>P-Value [5]</b>              |               |               | <b>0.0055</b>    |

Note: Only subjects who were responders are summarized GSD=Geometric Standard Deviation; CI=Confidence Interval. N/A=Not applicable.

[1] Confidence Interval (CI) is estimated using a two-sided Normal Approximation Method.

[2] P-value is based on a two-sample t-test using a 2-sided 0.05% significance level.

[3] A responder was defined as a subject whose value was greater than the following threshold values: HPV-16: 455; HPV-18: 450. The denominator for percentages is based on the total number of subjects (n) with a result at the visit being summarized.

[4] CI is estimated using a two-sided Exact (Clopper-Pearson) Method.

[5] P-value is based on a two-sample Chi-square test using a 2-sided 0.05% significance level.

[6] Difference is the relative difference. A value of one means the response after two doses is the same as the response after three doses.

[7] Difference is the absolute difference
